# Supplementary material
Source: bioRxiv or medRxiv preprint supplement (https://www.medrxiv.org/highwire/filestream/69483/field_highwire_adjunct_files/0/19007336-1.pdf)
Supplement: Supplementary file [file 19007336-1.pdf]

### Supplementary File 1: CAP checklist

| Patient details sticker                                                                               |                                                                                                                                    | 4hr Community Acquired Pneumonia Care Bundle                                                                                                                                                                                       |                                                      |
|-------------------------------------------------------------------------------------------------------|------------------------------------------------------------------------------------------------------------------------------------|------------------------------------------------------------------------------------------------------------------------------------------------------------------------------------------------------------------------------------|------------------------------------------------------|
|                                                                                                       |                                                                                                                                    | Date of admission:                                                                                                                                                                                                                 |                                                      |
|                                                                                                       |                                                                                                                                    | Time of admission:                                                                                                                                                                                                                 |                                                      |
| <b>B</b> reathlessness, cough and pyrexia                                                             | Symptoms suggestive of LRTI                                                                                                        | Yes<br>No                                                                                                                                                                                                                          | <input type="checkbox"/><br><input type="checkbox"/> |
| <b>R</b> adiology reviewed                                                                            | New consolidation                                                                                                                  | Yes<br>No                                                                                                                                                                                                                          | <input type="checkbox"/><br><input type="checkbox"/> |
| <b>EWS</b>                                                                                            | Use EWS escalation tool<br>Fluid if SBP < 90<br>Consider catheter                                                                  | EWS Score                                                                                                                                                                                                                          | <input type="text"/>                                 |
| <b>A</b> ssess Severity CURB65                                                                        | Confusion<br>Urea >7<br>RR > 30<br>BP – SBP < 90 DBP < 60<br>65 age > 65<br><b>Total</b>                                           | <input type="checkbox"/><br><input type="checkbox"/><br><input type="checkbox"/><br><input type="checkbox"/><br><input type="checkbox"/><br><input type="checkbox"/><br><input type="checkbox"/><br><input type="checkbox"/>       | <input type="text"/>                                 |
| <b>T</b> reatment                                                                                     | Use UHL guidance (see diagram below)                                                                                               |                                                                                                                                                                                                                                    | <input type="checkbox"/>                             |
| <b>H</b> ypoxia treated in 1st hour                                                                   | Target sats. ≥94%<br>COPD 88-92%                                                                                                   |                                                                                                                                                                                                                                    | <input type="checkbox"/>                             |
| <b>E</b> xpert advice                                                                                 | Bleep pneumonia nurse (2713)<br>Virtual respiratory clinic (mobile / ICM)                                                          |                                                                                                                                                                                                                                    | <input type="checkbox"/><br><input type="checkbox"/> |
| <b>Score 0-1</b> <input type="checkbox"/>                                                             | <b>Score 2</b> <input type="checkbox"/>                                                                                            | <b>Score 3-5</b> <input type="checkbox"/>                                                                                                                                                                                          |                                                      |
| Amoxicillin 500 mg po tds 5/7<br>or<br><b>if Penicillin allergic:</b><br>Doxycycline 200 mg po od 5/7 | Amoxicillin 1 g po tds 5/7<br>Doxycycline 200 mg po od 5/7<br>or<br><b>if Penicillin allergic:</b><br>Doxycycline 200 mg po od 5/7 | Coamoxiclav 1.2g tds IV 5/7<br>Doxycycline 200 mg po od 5/7<br>or<br><b>if Penicillin allergic:</b><br>Doxycycline 200 mg po od 5/7<br>IV meropenem 500mg tds 5/7<br><b>If anaphylaxis to penicillin discuss with microbiology</b> |                                                      |
| <b>Time Antibiotics given:</b><br>(= bundle completion)                                               | <b>Name of Doctor:</b>                                                                                                             | <b>Grade of Doctor:</b>                                                                                                                                                                                                            |                                                      |
